# Supplementary material for: Short-term efficacy of different chemotherapy regimens in the treatment of advanced gastric cancer: a network meta-analysis
Source: PubMed Central journal article supplement (PMC5514960; doi:10.18632/oncotarget.14664), 2017-01-14
Supplement: oncotarget-08-37896-s001.pdf [file oncotarget-08-37896-s001.pdf]

## **Short-term efficacy of different chemotherapy regimens in the treatment of advanced gastric cancer: a network meta-analysis**

### **SUPPLEMENTARY TABLES**

**Supplementary Table 1: Odds ratio and 95% confidence intervals of twenty four treatment modalities for DCR according to the network meta-analysis**

See Supplementary File 1

**Supplementary Table 2: Odds ratio and 95% confidence intervals of twenty four treatment modalities for ORR according to the network meta-analysis**

See Supplementary File 2
